# Supplementary material for: The Phenotypic and Mutational Spectrum of the FHONDA Syndrome and Oculocutaneous Albinism: Similarities and Differences
Source: PubMed Central journal article supplement (PMC8762694; doi:10.1167/iovs.63.1.19), 2022-01-14
Supplement: iovs-63-1-19_s001.pdf [file iovs-63-1-19_s001.pdf]

Supplemental table S1. Grading scheme for foveal hypoplasia according to Thomas *et al.*<sup>20</sup>

| <b>Grade of foveal hypoplasia</b> | <b>Optical coherence tomography findings</b>                                                 |
|-----------------------------------|----------------------------------------------------------------------------------------------|
| <b>Grade 0</b>                    | Normal foveal structure                                                                      |
| <b>Grade 1</b>                    | No extrusion of plexiform layers, a foveal pit is still present, other structures are normal |
| <b>Grade 2</b>                    | Absence of a foveal pit, underlying foveal structures are normal                             |
| <b>Grade 3</b>                    | No foveal pit, no lengthening of the outer segments, normal outer nuclear layer              |
| <b>Grade 4</b>                    | No foveal pit, no lengthening of the outer segments, no widening of the outer nuclear layer  |
