# Supplementary material for: The Phenotypic and Mutational Spectrum of the FHONDA Syndrome and Oculocutaneous Albinism: Similarities and Differences
Source: PubMed Central journal article supplement (PMC8762694; doi:10.1167/iovs.63.1.19), 2022-01-14
Supplement: iovs-63-1-19_s002.pdf [file iovs-63-1-19_s002.pdf]

Supplemental table S2. Molecular analyses FHONDA patients from literature\*

| <b>Family</b>                                   | <b>Descent</b>          | <b>Mutations SLC38A8 gene</b>                                                            |
|-------------------------------------------------|-------------------------|------------------------------------------------------------------------------------------|
| Poulter <i>et al.</i> F1:IV:1 <sup>6,7,14</sup> | <i>Pakistani</i>        | Homozygous c.707T>A; p.(Val236Asp)                                                       |
| Poulter <i>et al.</i> F1:IV:3 <sup>6,7,14</sup> | <i>Pakistani</i>        | Homozygous c.707T>A; p.(Val236Asp)                                                       |
| Poulter <i>et al.</i> F1:IV:4 <sup>6,7,14</sup> | <i>Pakistani</i>        | Homozygous c.707T>A; p.(Val236Asp)                                                       |
| Poulter <i>et al.</i> F1:IV:6 <sup>6,7,14</sup> | <i>Pakistani</i>        | Homozygous c.707T>A; p.(Val236Asp)                                                       |
| Poulter <i>et al.</i> F1:IV:7 <sup>6,7,14</sup> | <i>Pakistani</i>        | Homozygous c.707T>A; p.(Val236Asp)                                                       |
| Poulter <i>et al.</i> F4:II:1 <sup>7</sup>      | <i>Pakistani</i>        | Homozygous c.1029del; p.(Leu344Cysfs*7)                                                  |
| Poulter <i>et al.</i> F5:IV:1 <sup>7</sup>      | <i>Turkish</i>          | Homozygous c.101T>G; p.(Met34Arg)                                                        |
| Poulter <i>et al.</i> F6:IV:7 <sup>7,16</sup>   | <i>Indian</i>           | Homozygous c.697G>A; p.(Glu233Lys)                                                       |
| Poulter <i>et al.</i> F6:VI:1 <sup>7,16</sup>   | <i>Indian</i>           | Homozygous c.697G>A; p.(Glu233Lys)                                                       |
| Poulter <i>et al.</i> F6:VI:2 <sup>7,16</sup>   | <i>Indian</i>           | Homozygous c.697G>A; p.(Glu233Lys)                                                       |
| Toral <i>et al.</i> II:1 <sup>15</sup>          | <i>Ashkenazi-Jewish</i> | Homozygous c.848A>C; p.(Asp283Ala)                                                       |
| Toral <i>et al.</i> II:2 <sup>15</sup>          | <i>Ashkenazi-Jewish</i> | Homozygous c.848A>C; p.(Asp283Ala)                                                       |
| Campbell <i>et al.</i> proband 2 <sup>17</sup>  | <i>British</i>          | c.534C>G; p.(Ile178Met) and c.(189+1_190-1)_(690+1_691-1)del; p.(?) deletion exon 2 to 5 |
| Weiner <i>et al.</i> F1:II:1 <sup>18</sup>      | <i>Karait Jewish</i>    | Homozygous c.95T>G; p.(Ile32Ser)                                                         |
| Weiner <i>et al.</i> F1:II:2 <sup>18</sup>      | <i>Karait Jewish</i>    | Homozygous c.95T>G; p.(Ile32Ser)                                                         |
| Weiner <i>et al.</i> F2:II:3 <sup>18</sup>      | <i>Karait Jewish</i>    | Homozygous c.95T>G; p.(Ile32Ser)                                                         |
| Weiner <i>et al.</i> F3:II:1 <sup>18</sup>      | <i>Indian Jewish</i>    | Homozygous c.95T>G; p.(Ile32Ser)                                                         |
| Weiner <i>et al.</i> F3:II:2 <sup>18</sup>      | <i>Indian Jewish</i>    | Homozygous c.95T>G; p.(Ile32Ser)                                                         |
| Weiner <i>et al.</i> F4:II:1 <sup>18</sup>      | <i>Indian Jewish</i>    | Homozygous c.95T>G; p.(Ile32Ser)                                                         |
| Weiner <i>et al.</i> F5:II:1 <sup>18</sup>      | <i>Indian Jewish</i>    | c.95T>G; p.(Ile32Ser) and c.490-491del; p.(Leu164Valfs*41)                               |
| Lasseaux <i>et al.</i> P2 <sup>13</sup>         | <i>Caucasian</i>        | c.527C>G; p.(Thr176Arg) and c.848A>C; p.(Asp283Ala)                                      |
| Lasseaux <i>et al.</i> P4 <sup>13</sup>         | <i>Caucasian</i>        | c.6_9del; p.(Glu2Aspfs*32) and c.923C>G; p.(Thr308Ser)                                   |
| Kuht <i>et al.</i> F1:II-1 <sup>14</sup>        | <i>Korean</i>           | c.692G>A; p.(Cys231Tyr) and c.964C>T; p.(Gln322*)                                        |
| Kuht <i>et al.</i> F1:II-2 <sup>14</sup>        | <i>Korean</i>           | c.692G>A; p.(Cys231Tyr) and c.964C>T; p.(Gln322*)                                        |

|                                         |                  |                                                                                                          |
|-----------------------------------------|------------------|----------------------------------------------------------------------------------------------------------|
| <i>Kuht et al</i> F2:II-1 <sup>14</sup> | <i>Korean</i>    | c.558C>A; p.(Tyr186*) and c.1078_1104del; p.(Ala360_Leu368del)                                           |
| <i>Kuht et al</i> F3:II-1 <sup>14</sup> | <i>Korean</i>    | c.995dupG; p.(Trp333Metfs*35) and c.1214+5G>C                                                            |
| <i>Kuht et al</i> F4:II-1 <sup>14</sup> | <i>Korean</i>    | c.855G>C; p.(Leu285Phe) and c.995dupG; p.(Trp333Metfs*35)                                                |
| <i>Kuht et al</i> F5:II-1 <sup>14</sup> | <i>Korean</i>    | c.644G>T <sup>†</sup> ; p.(Trp215Leu), c.682G>A <sup>†</sup> ; p.(Gly228Arg) and c.695A>G; p.(His232Arg) |
| <i>Kuht et al</i> F5:II-2 <sup>14</sup> | <i>Korean</i>    | c.644G>T <sup>†</sup> ; p.(Trp215Leu), c.682G>A <sup>†</sup> ; p.(Gly228Arg) and c.695A>G; p.(His232Arg) |
| <i>Kuht et al</i> F6:II-2 <sup>14</sup> | <i>Korean</i>    | c.954-1G>C and c.995dupG; p.(Trp333Metfs*35)                                                             |
| <i>Kuht et al</i> F7:II-3 <sup>14</sup> | <i>Turkish</i>   | Homozygous c.101T>G; p.(Met34Arg)                                                                        |
| <i>Kuht et al</i> F8:II-1 <sup>14</sup> | <i>Caucasian</i> | Homozygous c.632+2T>G                                                                                    |
| <i>Kuht et al</i> F9:II-1 <sup>14</sup> | <i>Caucasian</i> | Exon 1 deletion and c.1126G>A; p.(Gly376Arg)                                                             |

\*FHONDA patient P1 from Lasseaux *et al* was discarded from their series.<sup>13</sup> <sup>†</sup>These two variants were present in cis configuration<sup>14</sup>
