# Supplementary material for: The Phenotypic and Mutational Spectrum of the FHONDA Syndrome and Oculocutaneous Albinism: Similarities and Differences
Source: PubMed Central journal article supplement (PMC8762694; doi:10.1167/iovs.63.1.19), 2022-01-14
Supplement: iovs-63-1-19_s003.pdf [file iovs-63-1-19_s003.pdf]

Supplemental table S3. Phenotype FHONDA patients from literature\*

| Family-ID                                          | Refraction RE,<br>LE <sup>†</sup>  | VA‡ | Nystagmus | Iris<br>translucency | Foveal<br>Hypoplasia <sup>§</sup> | Anterior<br>segment      | Hypopigmentation | Misrouting   |
|----------------------------------------------------|------------------------------------|-----|-----------|----------------------|-----------------------------------|--------------------------|------------------|--------------|
| Poulter <i>et al.</i><br>F1:IV:1 <sup>6,7,14</sup> | -0.25/-3.25x175<br>-0.50/-3.00x10  | 0.8 | Yes       | No                   | Grade 4                           | Axenfeld's<br>anomaly    | No               | Yes          |
| Poulter <i>et al.</i><br>F1:IV:3 <sup>6,7,14</sup> | +6.50/-2.00x172<br>+6.00/-2.00x168 | 0.8 | Yes       | No                   | Grade 4                           | Posterior<br>embryotoxon | Unknown          | Yes          |
| Poulter <i>et al.</i><br>F1:IV:4 <sup>6,7,14</sup> | +4.50/-3.00x5<br>+4.25/-3.50x5     | 1.0 | Yes       | No                   | ND                                | Posterior<br>embryotoxon | No               | ND           |
| Poulter <i>et al.</i><br>F1:IV:6 <sup>6,7,14</sup> | ND                                 | ND  | Yes       | No                   | ND                                | Posterior<br>embryotoxon | Unknown          | ND           |
| Poulter <i>et al.</i><br>F1:IV:7 <sup>6,7,14</sup> | +2.50/-2.25x180<br>+3.50/-3.25x180 | 1.3 | Yes       | No                   | ND                                | Axenfeld's<br>anomaly    | Unknown          | ND           |
| Poulter <i>et al.</i><br>F4:II:1 <sup>7</sup>      | ND                                 | ND  | Unknown   | No                   | ND                                | Normal                   | Unknown          | Inconclusive |
| Poulter <i>et al.</i><br>F5:IV:1 <sup>7</sup>      | ND                                 | ND  | Unknown   | No                   | ND                                | Normal                   | Normal           | Yes          |

|                                                   |                                   |     |     |    |         |                                                                                                       |                                       |     |
|---------------------------------------------------|-----------------------------------|-----|-----|----|---------|-------------------------------------------------------------------------------------------------------|---------------------------------------|-----|
| Poulter <i>et al.</i><br>F6:IV:7 <sup>7,16</sup>  | +11.00<br>+10.00                  | 1.0 | Yes | No | ND      | Bilateral<br>microphthalmia<br>and unilateral<br>retinochoroidal<br>coloboma and<br>uveal<br>coloboma | No                                    | ND  |
| Poulter <i>et al.</i><br>F6:VI:1 <sup>7,16</sup>  | +8.50/-2.00x160<br>+7.50/-1.25x20 | 0.7 | Yes | No | ND      | Bilateral<br>microphthalmia                                                                           | No                                    | ND  |
| Poulter <i>et al.</i><br>F6:VI:2 <sup>7,16</sup>  | +7.00/-2.75x10<br>+6.50/-2.0x180  | 0.7 | Yes | No | ND      | Normal                                                                                                | No                                    | ND  |
| Toral <i>et al.</i> II:1 <sup>15</sup>            | ND                                | 0.6 | Yes | No | Grade 4 | Normal                                                                                                | No                                    | ND  |
| Toral <i>et al.</i> II:2 <sup>15</sup>            | ND                                | 0.7 | Yes | No | Grade 4 | Normal                                                                                                | No                                    | ND  |
| Campbell <i>et al.</i><br>proband 2 <sup>17</sup> | ND                                | ND  | Yes | No | Grade 4 | Posterior<br>embryotoxon                                                                              | Hypopigmentation in<br>(mid)periphery | Yes |
| Weiner <i>et al.</i><br>F1:II:1 <sup>18</sup>     | ND                                | 0.5 | Yes | No | ND      | Normal                                                                                                | No                                    | ND  |
| Weiner <i>et al.</i><br>F1:II:2 <sup>18</sup>     | ND                                | 0.5 | Yes | No | ND      | Normal                                                                                                | No                                    | Yes |
| Weiner <i>et al.</i><br>F2:II:3 <sup>18</sup>     | ND                                | ND  | Yes | No | Grade 4 | Posterior<br>embryotoxon                                                                              | No                                    | ND  |

|                                               |                                      |     |     |     |         |        |                  |     |
|-----------------------------------------------|--------------------------------------|-----|-----|-----|---------|--------|------------------|-----|
| Weiner <i>et al.</i><br>F3:II:1 <sup>18</sup> | ND                                   | ND  | Yes | No  | ND      | Normal | No               | ND  |
| Weiner <i>et al.</i><br>F3:II:2 <sup>18</sup> | ND                                   | ND  | Yes | No  | ND      | Normal | No               | ND  |
| Weiner <i>et al.</i><br>F4:II:1 <sup>18</sup> | ND                                   | 0.9 | Yes | No  | ND      | Normal | No               | ND  |
| Weiner <i>et al.</i><br>F5:II:1 <sup>18</sup> | ND                                   | ND  | Yes | No  | ND      | Normal | No               | ND  |
| Lasseaux <i>et al.</i><br>P2 <sup>13</sup>    | ND                                   | 0.5 | Yes | No  | ND      | ND     | No               | ND  |
| Lasseaux <i>et al.</i><br>P4 <sup>13</sup>    | ND                                   | 0.5 | Yes | Yes | ND      | ND     | No               | ND  |
| <i>Kuht et al.</i><br>F1:II-1 <sup>14</sup>   | +2.00/ -3.00 x180<br>+2.00/-3.00x180 | 0.5 | Yes | No  | Grade 3 | Normal | No               | Yes |
| <i>Kuht et al.</i><br>F1:II-2 <sup>14</sup>   | -0.25/-3.00x180<br>-0.50/-4.00x180   | 0.7 | Yes | No  | Grade 3 | Normal | No               | Yes |
| <i>Kuht et al.</i><br>F2:II-1 <sup>14</sup>   | +2.75/-3.50x180<br>-3.25/-2.75x15    | 0.3 | Yes | No  | Grade 3 | Normal | No               | Yes |
| <i>Kuht et al.</i><br>F3:II-1 <sup>14</sup>   | +2.00/-3.00x180<br>+2.00/-4.00x180   | ND  | Yes | No  | ND      | Normal | Hypopigmentation | Yes |

|                                            |                                    |     |     |     |         |        |    |     |
|--------------------------------------------|------------------------------------|-----|-----|-----|---------|--------|----|-----|
| <i>Kuht et al</i><br>F4:II-1 <sup>14</sup> | +3.25/-2.00x180<br>+2.75/-2.50x180 | 0.4 | Yes | No  | Grade 3 | Normal | No | Yes |
| <i>Kuht et al</i><br>F5:II-1 <sup>14</sup> | +4.50/-4.00x170<br>+5.00/-3.00x180 | 0.3 | Yes | No  | Grade 3 | Normal | No | ND  |
| <i>Kuht et al</i><br>F5:II-2 <sup>14</sup> | +1.75/-3.50x180<br>+2.00/-3.50x180 | 0.3 | Yes | No  | Grade 3 | Normal | No | ND  |
| <i>Kuht et al</i><br>F6:II-2 <sup>14</sup> | +2.00/-2.00x180<br>+3.25/-2.50x10  | 0.4 | Yes | No  | Grade 3 | Normal | No | Yes |
| <i>Kuht et al</i><br>F7:II-3 <sup>14</sup> | +1.00/-2.00x180<br>+1.00/-2.00x180 | 0.6 | Yes | No  | Grade 3 | Normal | No | Yes |
| <i>Kuht et al</i><br>F8:II-1 <sup>14</sup> | +3.75/-4.50x180<br>+4.00/-4.00x180 | 0.6 | Yes | Yes | Grade 4 | Normal | No | Yes |
| <i>Kuht et al</i><br>F9:II-1 <sup>14</sup> | +1.25/-1.25x160<br>+1.00/-1.00x180 | 0.6 | Yes | No  | Grade 4 | Normal | No | Yes |

ND=not determined. \* FHONDA patient P1 from Lasseaux *et al* was discarded from their series.<sup>13</sup> †Refraction right eye (RE) and left eye (LE). ‡Visual acuity in logMAR.

§According to the grading of Thomas *et al*.<sup>19</sup>
